# Supplementary material
Source: publisher figshare collection journal article supplement (https://acs.figshare.com/ndownloader/files/4062652)
Supplement: Supplementary file 1 [file 4062652]

**Supporting Information**

EQCM Investigation of Electrochemical Deposition  
and Stability of Co-Pi Oxygen Evolution Catalyst of  
Solar Energy Storage

*Ahamed Irshad and Nookala Munichandraiah\**

Department of Inorganic and Physical Chemistry, Indian Institute of Science,

Bangalore-560012, India

\*E-mail: *muni@ipc.iisc.ernet.in*

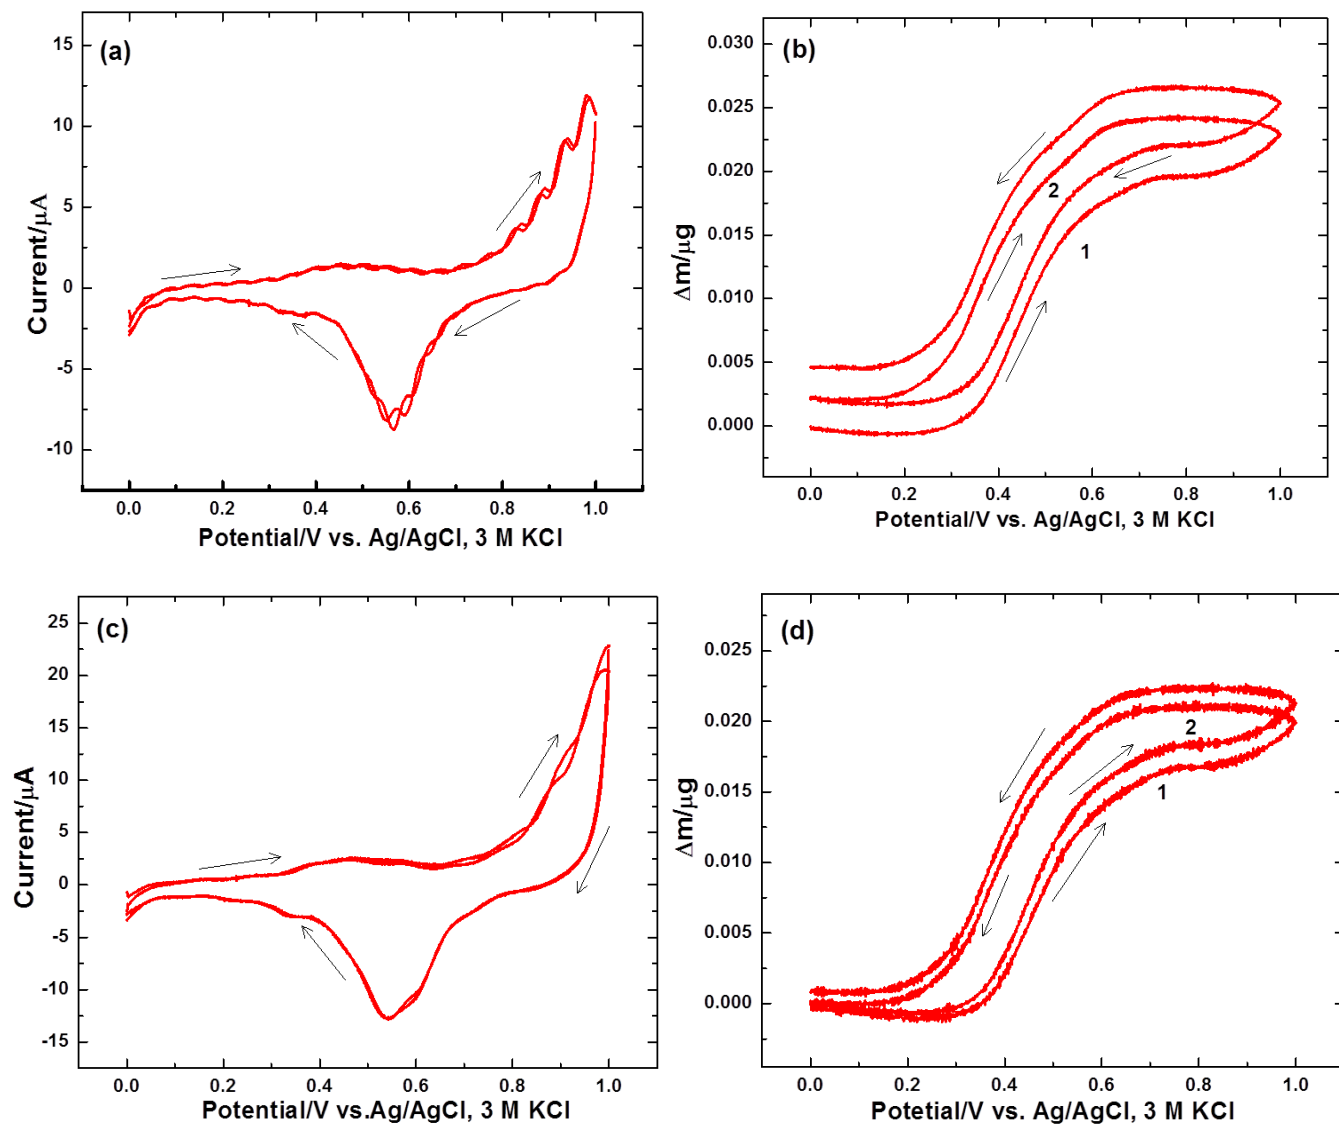

**Figure S1:**(a and c) Cyclic voltammograms and (b and d) mass variation ( $\Delta m$ ) vs. potential of Au coated quartz crystal in 0.1 M Phosphate buffer (pH 7) at a sweep rate of (a and b) 25 mVs<sup>-1</sup> and (c and d) 50 mVs<sup>-1</sup>. Area of the Au electrode is 0.205 cm<sup>2</sup>.

## Measurement of motional resistance:

The figures presented below suggest that the motional resistance of the quartz crystal measured as a function of potential, time and mass of the deposit is nearly invariant.

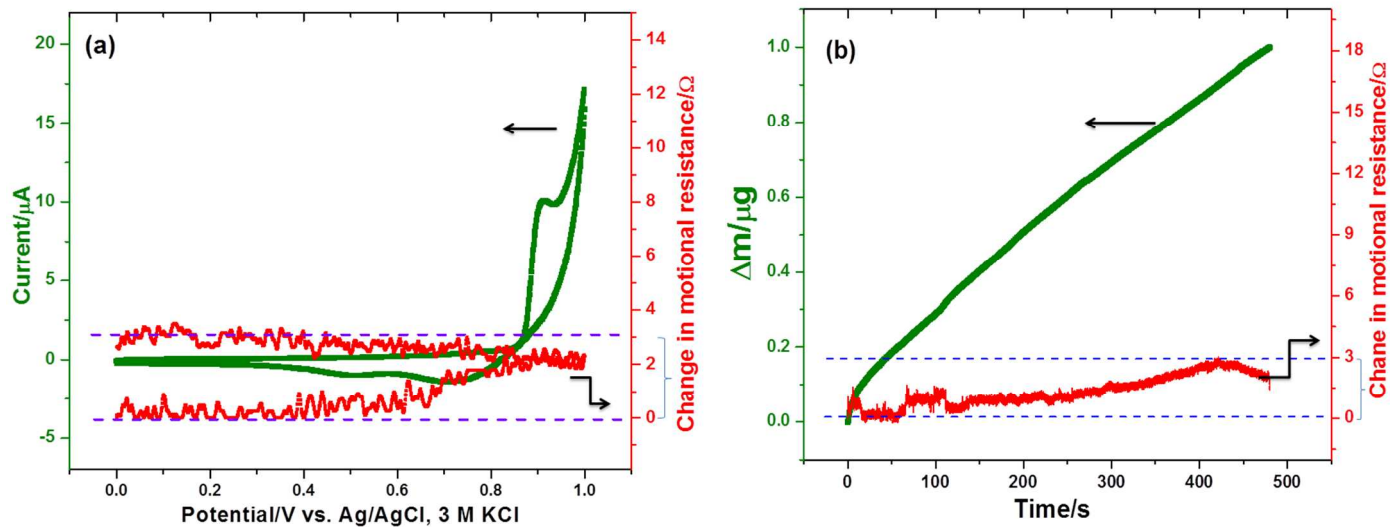

**Figure S2:**(a)Current (green) and motional resistance (red) variations with potential during cyclic voltammetry experiments at  $5 \text{ mVs}^{-1}$  using Au coated quartz crystal(area  $0.205 \text{ cm}^2$ )in 0.1 M phosphate buffer (pH 7) containing  $0.5 \text{ mM Co}^{2+}$ . (b) Variations in mass (green) and change of motional resistance (red) with time of Co-Pi catalyst depositionat 1.00 V.

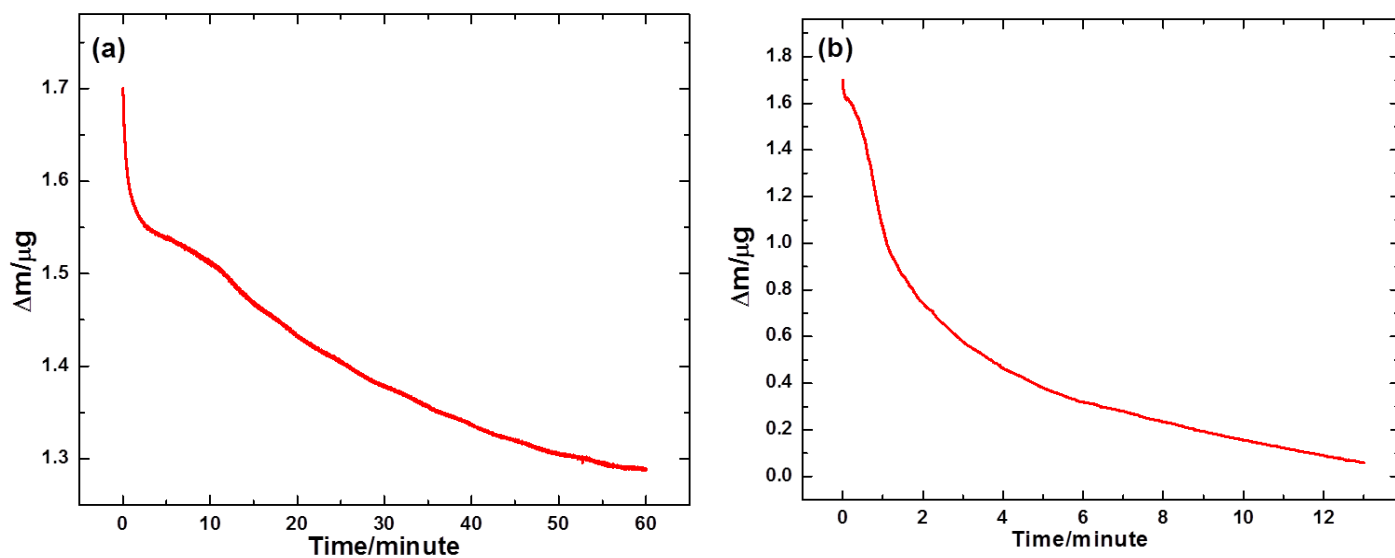

**Figure S3:** Mass variation of Co-Pi coated (1.7  $\mu\text{g}$ ) Au coated quartz crystal electrode during electrolysis in 0.1 M  $\text{K}_2\text{SO}_4$  at (a) 0.60 and (b) 1.60 V.

### **Tafel Experiments:**

The superior performance of the in-situ formed Co-Pi catalyst on Au surface was evidenced from slow scan rate ( $0.05 \text{ mV s}^{-1}$ ) linear sweep voltammograms and Tafel plots measured under stirring condition (Fig. S3). Current density of about  $2 \text{ mA cm}^{-2}$  was observed at  $1.10 \text{ V}$  in neutral phosphate buffer containing  $\text{Co}^{2+}$  (Fig. S3 curve i) whereas it requires more than  $1.36 \text{ V}$  to attain the same current density in the absence of cobalt salts (Fig. S3 curve ii). It is also found that the deposited Co-Pi catalyst retains comparable OER activity even in non-cobaltous solution (Fig. S3 curve iii), suggesting catalytic activity of Co-Pi in the absence of  $\text{Co}^{2+}$  in buffer solution. Linear regime of the Tafel plot (inset in Fig.S3) provides a slope of  $94$  and  $150 \text{ mV}$  per decade, respectively in non-cobaltous and cobaltous solutions. Tafel slope for Co-Pi/Au electrode in  $0.1 \text{ M}$  phosphate buffer containing no  $\text{Co}^{2+}$  was  $109 \text{ mV}$  per decade, which is close to the literature value ( $100 \text{ mV}$  per log unit) for Co-Pi film/Co system.<sup>S1</sup>

### **References:**

S1: Young, E. R.; Nocera, D. G.; Bulovic, V. Direct Formation of a Water Oxidation Catalyst from Thin-film Cobalt. *Energy Environ. Sci.* **2010**, *3*, 1726-1728.

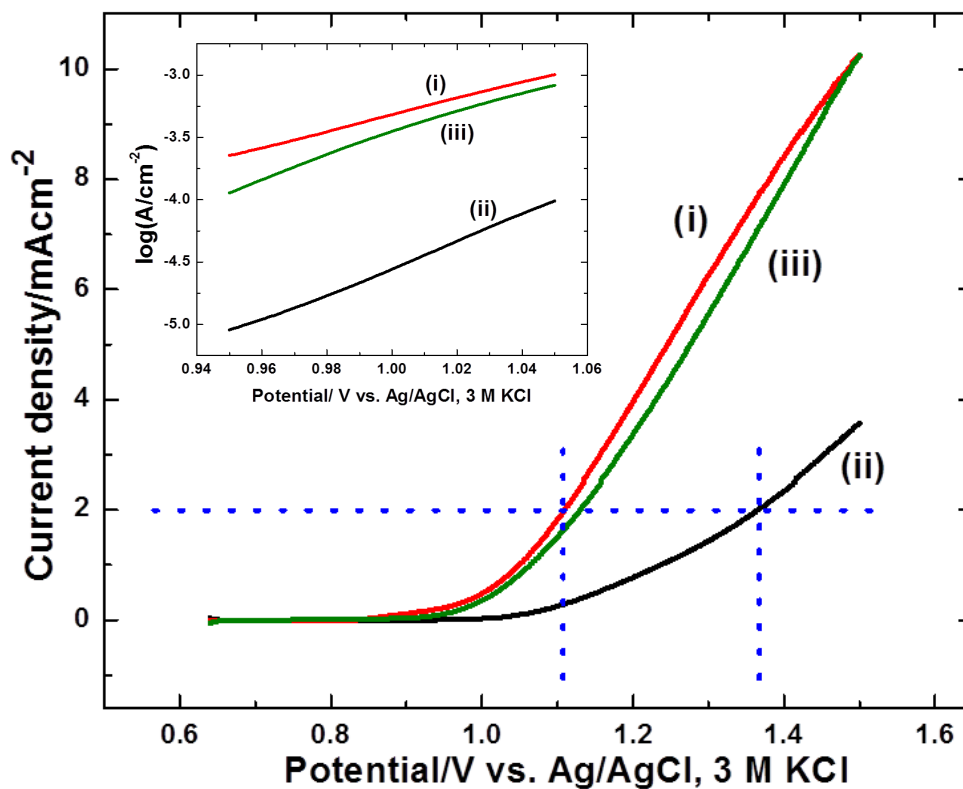

**Figure S4:** Linear sweep voltammograms of Au electrode ( $1\text{cm}^2$ ) at  $0.05\text{ mV s}^{-1}$  in  $0.1\text{ M}$  neutral phosphate buffer (i) with  $0.5\text{ mM Co}^{2+}$  (ii) without  $\text{Co}^{2+}$  and (iii) linear sweep voltammograms using Co-Pi deposited ( $20\text{ C cm}^{-2}$ ) Au electrode in  $0.1\text{ M}$  phosphate buffer without  $\text{Co}^{2+}$ . Inset shows the linear regime of the corresponding Tafel plots.
